# Supplementary material for: Probing the limits of sampling gaseous elemental mercury passively in the remote atmosphere
Source: Royal Society of Chemistry journal article supplement (doi:10.1039/d2ea00119e), 2022-12-12
Supplement: d2ea00119e1.pdf [file d2ea00119e1.pdf]

## Supporting Information for

### Probing the Limits of Sampling Gaseous Elemental Mercury Passively in the Remote Atmosphere

Christopher Hoang,<sup>1</sup> Olivier Magand,<sup>2,\*</sup> Jérôme Brioude,<sup>3</sup> Andrea Dimuro,<sup>4</sup> Christophe Brunet,<sup>4</sup> Claudine Ah-Peng,<sup>5</sup> Yann Bertrand,<sup>2</sup> Aurelien Dommergue,<sup>2</sup> Ying Duan Lei,<sup>1</sup> Frank Wania<sup>1,\*</sup>

<sup>1</sup>Department of Physical and Environmental Sciences, University of Toronto Scarborough, 1265 Military Trail, Toronto, Ontario, Canada M1C 1A4

<sup>2</sup> Université Grenoble Alpes, CNRS, IRD, Grenoble INP, IGE, Grenoble, France

<sup>3</sup> Laboratoire de l'Atmosphère et des Cyclones, UMR8105, CNRS, Université de La Réunion, 97744 Saint-Denis, France

<sup>4</sup> Institut de Physique du Globe de Paris, Observatoire Volcanologique du Piton de la Fournaise, 97418 La Plaine des Cafres Réunion France

<sup>5</sup> UMR PVBMT, Université de La Réunion, Saint-Pierre, France

\* Corresponding author: frank.wania@utoronto.ca, olivier.magand@cnrs.fr

#### Table of Content

|          |                                                                                                                                                                                 |     |
|----------|---------------------------------------------------------------------------------------------------------------------------------------------------------------------------------|-----|
| Fig. S1  | Global map indicating the location of La Réunion, Amsterdam Island and Concordia Station of the Antarctic Plateau.                                                              | S2  |
| Fig. S2  | Glass containers used for the transport and storage of individual passive air samplers during the second set of deployments at AMS and DMC.                                     | S2  |
| Fig. S3  | Map of the island of Réunion.                                                                                                                                                   | S3  |
| Fig. S4  | Map of Amsterdam Island.                                                                                                                                                        | S3  |
| Fig. S5  | Passive air sampling location at La Réunion University in Saint-Denis.                                                                                                          | S4  |
| Fig. S6  | Passive air sampling location at the Maïdo Observatory.                                                                                                                         | S4  |
| Fig. S7  | Passive air sampling location at Piton Bleu.                                                                                                                                    | S4  |
| Fig. S8  | Passive air sampling location at Mare Longue Forest                                                                                                                             | S5  |
| Fig. S9  | Passive air sampling location at the summit of the Piton de la Fournaise volcano.                                                                                               | S5  |
| Fig. S10 | Passive air sampling location at Piton Partage.                                                                                                                                 | S6  |
| Fig. S11 | Passive air sampling location at the eruptive cone (EC) of Piton de La Fournaise                                                                                                | S6  |
| Fig. S12 | Passive air sampling location at Pointe Benedictine Research Station, Amsterdam Island.                                                                                         | S7  |
| Fig. S13 | Passive air sampling location at ATMOS shelter at the Concordia Station, Antarctica.                                                                                            | S7  |
| Tab. S1  | Analytical detail on the field blank samples, including the figures of merit derived from the standard deviation of the mean of a batch of field blank samples.                 | S8  |
| Tab. S2  | Analytical detail on the samplers deployed on Amsterdam Island.                                                                                                                 | S9  |
| Tab. S3  | Analytical detail on the samplers deployed Concordia Station, Dome C, Antarctica.                                                                                               | S11 |
| Tab. S4  | Analytical detail on the samplers deployed at Piton Bleu, La Réunion.                                                                                                           | S12 |
| Tab. S5  | Analytical detail on the samplers deployed at University of Réunion, La Réunion.                                                                                                | S13 |
| Tab. S6  | Analytical detail on the samplers deployed at Piton Partage, La Réunion.                                                                                                        | S13 |
| Tab. S7  | Analytical detail on the samplers deployed at Maïdo Observatory, La Réunion.                                                                                                    | S14 |
| Tab. S8  | Analytical detail on the samplers deployed at Volcano Summit, La Réunion.                                                                                                       | S14 |
| Tab. S9  | Analytical detail on the samplers deployed at the Mare-Longue Forest, La Réunion.                                                                                               | S15 |
| Tab. S10 | Analytical detail on the samplers deployed at the Eruptive Cone, La Réunion.                                                                                                    | S15 |
| Text     | Discussion of whether a number of factors could provide an explanation of the larger than expected discrepancy between passive and active sampling at Maïdo Observatory         | S16 |
| Fig. S13 | Diurnal variability of ambient air temperature, wind speed and gaseous elemental mercury concentration at Maïdo Observatory during the fifth passive sampler deployment period. | S17 |
| Tab. S11 | Estimation of the bias introduced by ignoring the diurnal variability in temperature, wind speed and gaseous elemental mercury concentration.                                   | S18 |
| Fig. S14 | Hoar frost and material failures encountered during deployments of passive air samplers at Concordia Station, Dome C, Antarctica.                                               | S18 |

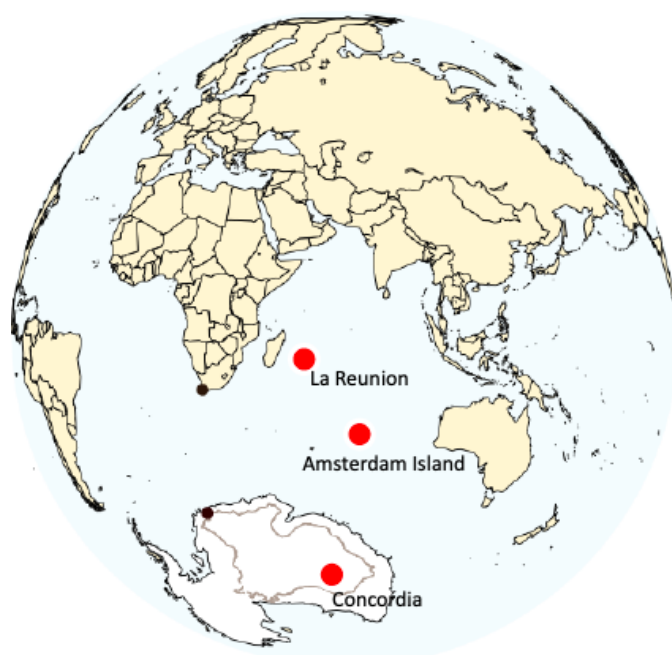

**Figure S1** Global map indicating the location of La Réunion, Amsterdam Island and Concordia Station of the Antarctic Plateau (Credit: Olivier Magand).

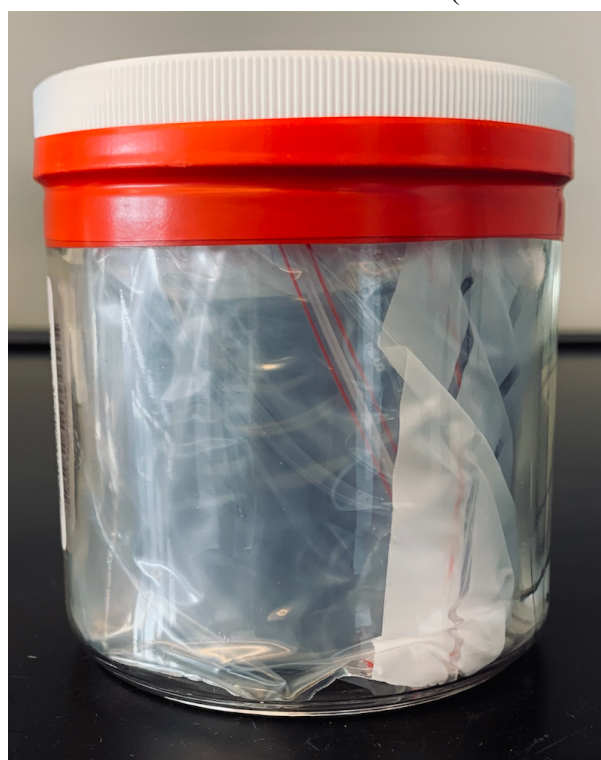

**Figure S2** Glass containers (Fisher Scientific JR CLR CRTCLN W/PTFE 16OZ 12CS, Cat. No. 02 912 312) used for the transport and storage of individual passive air samplers during the second set of deployments at AMS and DMC (Credit: Christopher Hoang).

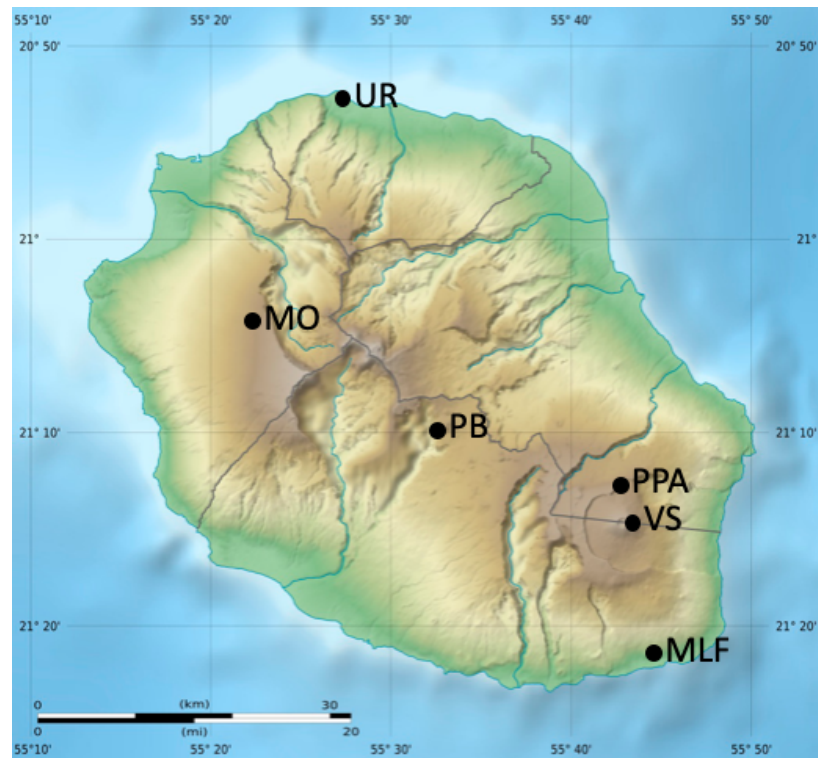

**Figure S3** Map of the island of Réunion showing topography and the location of the 6 major sampling sites (Credit for map: Eric Gaba, [https://commons.wikimedia.org/wiki/File:La\\_Réunion\\_department\\_relief\\_location\\_map.jpg](https://commons.wikimedia.org/wiki/File:La_Réunion_department_relief_location_map.jpg))

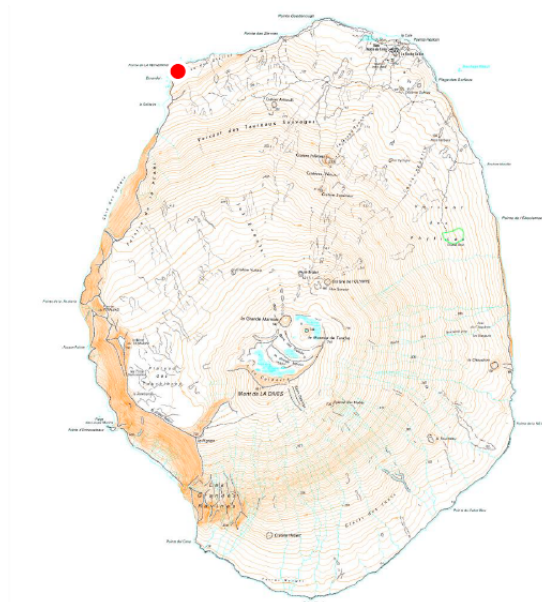

**Figure S4** Map of Amsterdam Island showing topography and the location of the sampling site at Point Bénédicte (Credit for map: Olivier Magand).

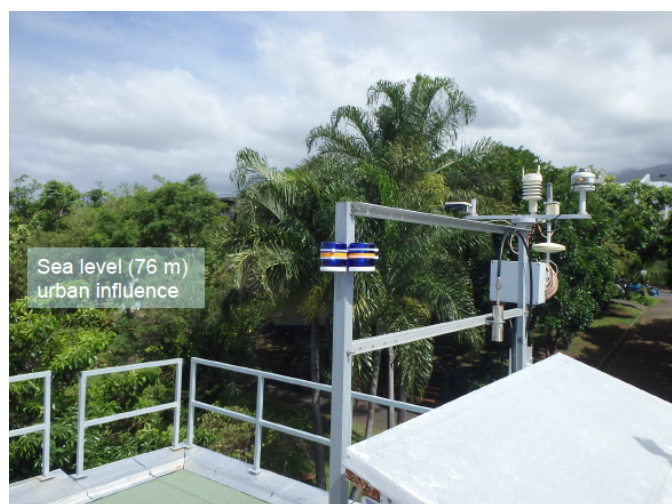

**Figure S5** Passive air sampling location at La Réunion University (Moufia) in Saint-Denis, La Réunion (RU-UR, roof) (Credit: Olivier Magand).

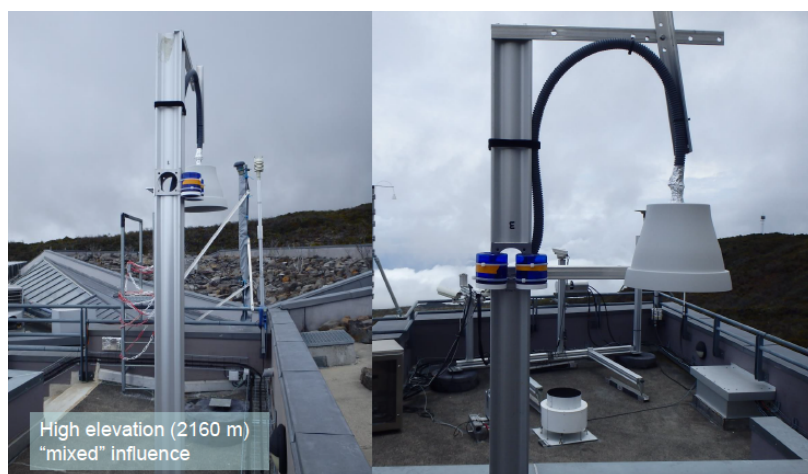

**Figure S6** Passive air sampling location at the Maïdo Observatory, La Réunion (RU-MO, instrumented roof, OPAR atmospheric station) (Credit: Olivier Magand).

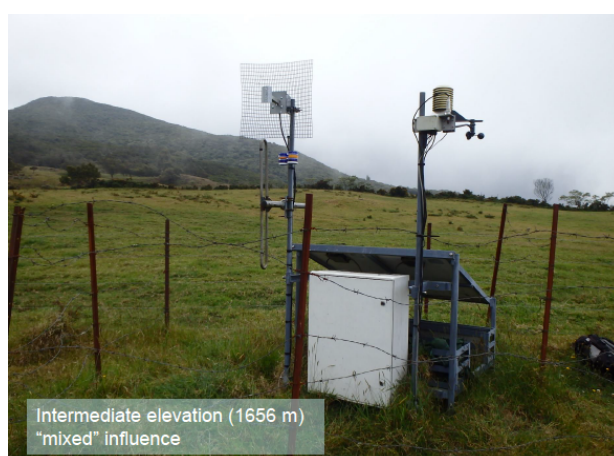

**Figure S7** Passive air sampling location at Piton Bleu, La Réunion (RU-PB, OVPF station) (Credit: Olivier Magand).



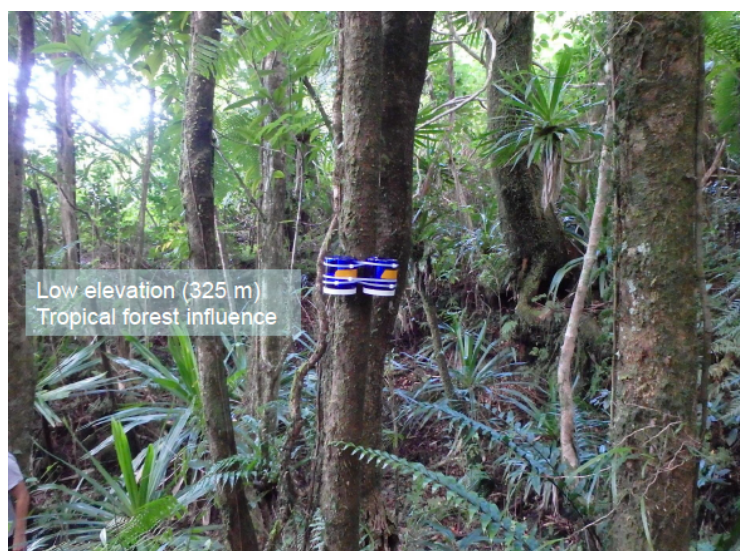

**Figure S8** Passive air sampling location at Mare Longue Forest, La Réunion (RU-MLF, OSUR-PVBMT forest station) (Credit: Olivier Magand).

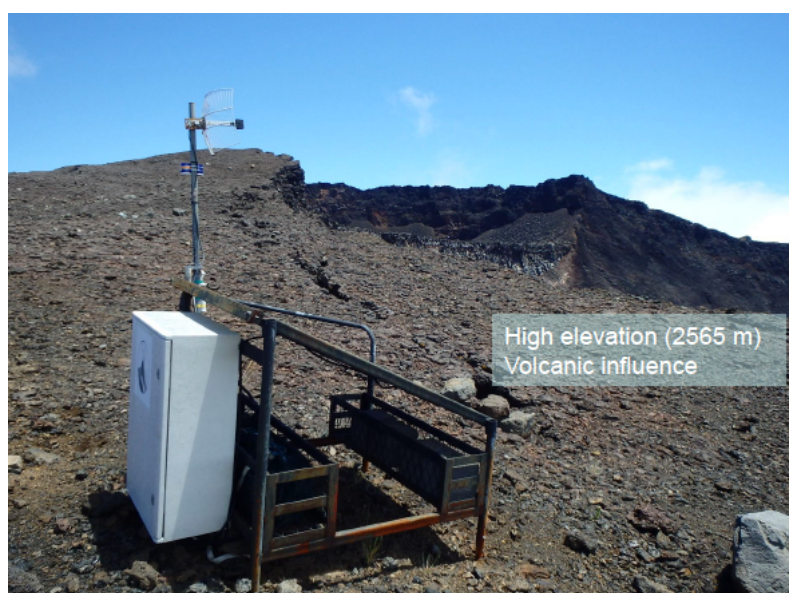

**Figure S9** Passive air sampling location at the summit of the Piton de la Fournaise volcano, La Réunion (RU-VS, OVPF station) (Credit: Olivier Magand).

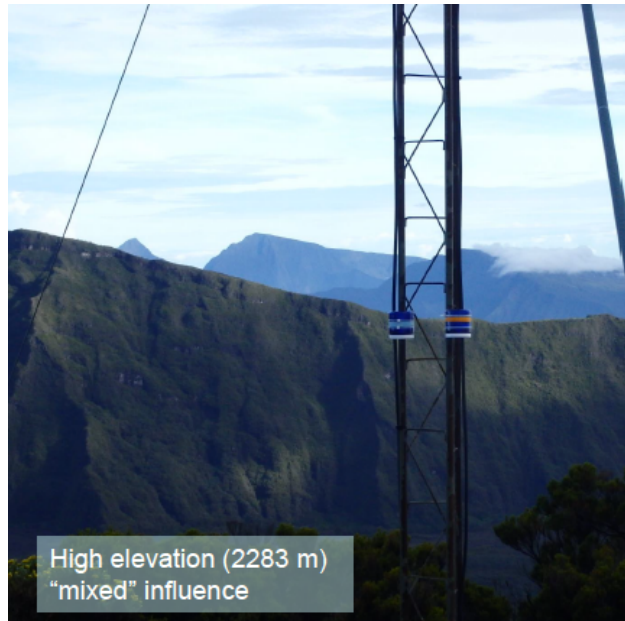

**Figure S10** Passive air sampling location at Piton Partage, La Réunion (RU-PPA, OVPF station) (Credit: Olivier Magand).

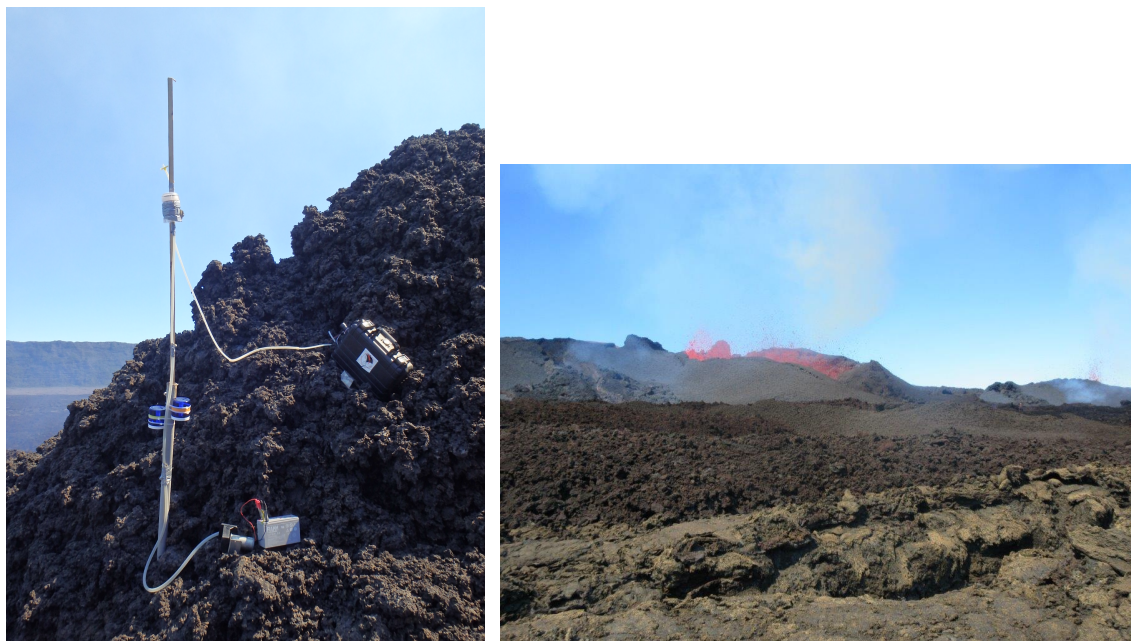

**Figure S11** Passive air sampling location at the eruptive cone (RU-EC) of Piton de La Fournaise (Credit: Olivier Magand).



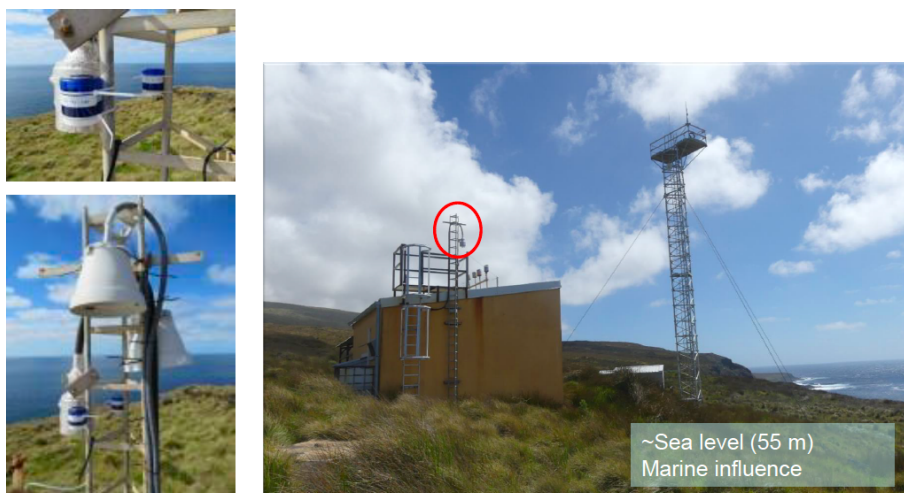

**Figure S12** Passive air sampling location at Pointe Benedicte Atmospheric Observatory, Amsterdam Island (Credit: Olivier Magand).

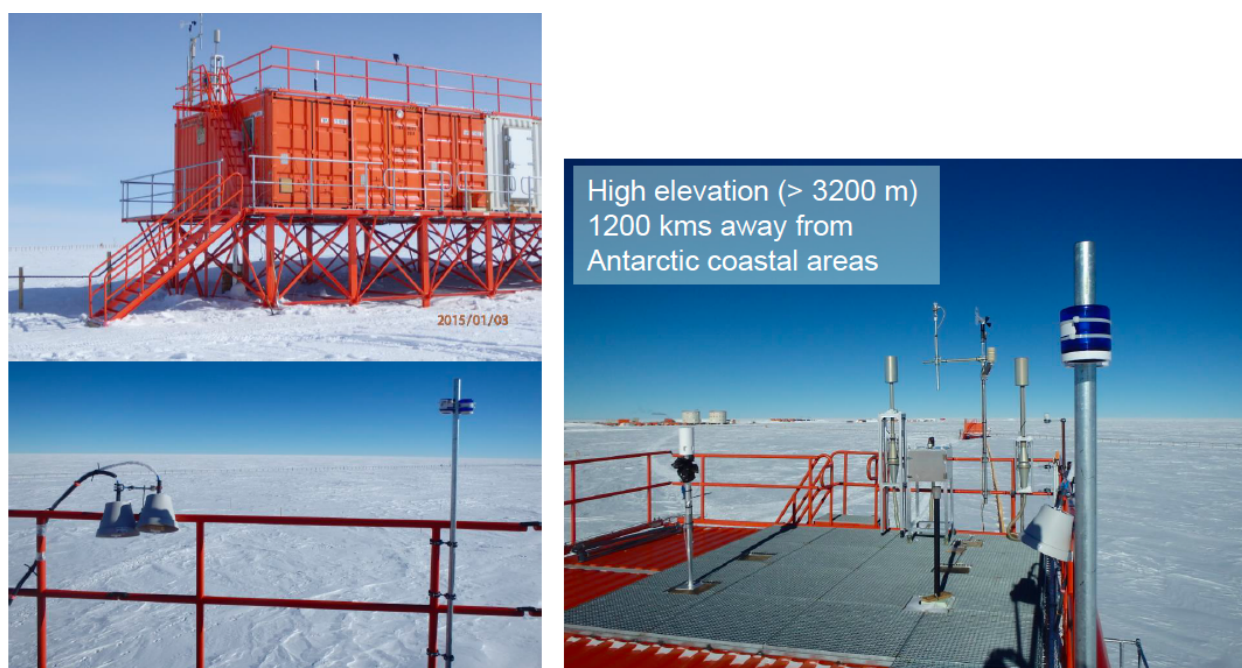

**Figure S13** Passive air sampling location at the ATMOS shelter (Concordia Station, Antarctica) (Credit: Olivier Magand).

**Table S1** Analytical detail on the field blank samples, including the figures of merit derived from the standard deviation of the mean of a batch of field blank samples.

| Code                                       | site | m <sub>C</sub><br>g | m <sub>Hg</sub><br>ng | C <sub>Hg</sub><br>ng/g |                                      |
|--------------------------------------------|------|---------------------|-----------------------|-------------------------|--------------------------------------|
| <b>La Réunion (11/17 to 06/18)</b>         |      |                     |                       |                         |                                      |
| RU-Blank-B1                                | MO   | 0.6499              | 0.274                 | 0.42                    | C <sub>Hg</sub> -avg= 1.14±0.42 ng/g |
| RU-Blank-B2                                | MO   | 0.6390              | 0.500                 | 0.78                    | MDL = 0.84 ng, PQL = 2.8 ng          |
| RU-Blank-B8                                | MO   | 0.6432              | 0.804                 | 1.25                    |                                      |
| RU-Blank-B10                               | MFL  | 0.6627              | 0.721                 | 1.09                    |                                      |
| RU-Blank-B5                                | MFL  | 0.6607              | 0.889                 | 1.35                    |                                      |
| RU-Blank-B6                                | UR   | 0.7350              | 0.916                 | 1.25                    |                                      |
| RU-Blank-B7                                | UR   | 0.6604              | 1.06                  | 1.61                    |                                      |
| RU-Blank-B4                                | VS   | 0.6708              | 0.403                 | 0.60                    |                                      |
| RU-Blank-B9                                | VS   | 0.6712              | 1.15                  | 1.71                    |                                      |
| RU-Blank-B3                                | PB   | 0.6686              | 0.892                 | 1.33                    |                                      |
| <b>La Réunion (06/18 to 02/19)</b>         |      |                     |                       |                         |                                      |
| RU-Blank-B11                               | PB   | 0.6362              | 2.44                  | 3.83                    | C <sub>Hg</sub> -avg= 4.36±0.75 ng/g |
| RU-Blank-B12                               | PB   | 0.6260              | 3.06                  | 4.89                    | MDL = 1.4 ng, PQL = 4.7 ng           |
| <b>Amsterdam Island (11/18 to 12/19)</b>   |      |                     |                       |                         |                                      |
| AMS-Blank-B1                               |      | 0.7087              | 3.92                  | 5.53                    | C <sub>Hg</sub> -avg= 6.15±3.74 ng/g |
| AMS-Blank-B2                               |      | 0.6810              | 5.47                  | 8.04                    | MDL = 7.9 ng, PQL = 26 ng            |
| AMS-PB-B3                                  |      | 0.6646              | 6.97                  | 10.5                    |                                      |
| AMS-PB-B4                                  |      | 0.7296              | 4.59                  | 6.30                    |                                      |
| AMS-PB-B5                                  |      | 0.7292              | 0.279                 | 0.38                    |                                      |
| <b>Amsterdam Island (12/19 to 11/21)</b>   |      |                     |                       |                         |                                      |
| AMS-PB-B6                                  |      | 0.7217              | 1.13                  | 1.57                    | C <sub>Hg</sub> -avg= 1.02±0.55 ng/g |
| AMS-PB-B7                                  |      | 0.7464              | 0.577                 | 0.77                    | MDL = 1.1 ng, PQL = 3.7 ng           |
| AMS-PB-B8                                  |      | 0.7684              | 0.403                 | 0.52                    |                                      |
| AMS-PB-B9                                  |      | 0.7334              | 1.27                  | 1.72                    |                                      |
| AMS-PB-B10                                 |      | 0.679               | 0.357                 | 0.53                    |                                      |
| AMS-PB-B11                                 |      | 0.505               | 0.738                 | 1.46                    |                                      |
| AMS-PB-B12                                 |      | 0.544               | 0.288                 | 0.53                    |                                      |
| <b>Concordia Station (11/18 to 12/19)</b>  |      |                     |                       |                         |                                      |
| DMC-TB1                                    |      | 0.6525              | 3.18                  | 4.87                    | C <sub>Hg</sub> -avg= 4.11±0.90 ng/g |
| DMC-B1                                     |      | 0.6945              | 2.82                  | 4.06                    | MDL = 1.8 ng, PQL = 6.0 ng           |
| DMC-B2                                     |      | 0.6498              | 1.86                  | 2.86                    |                                      |
| DMC-B3                                     |      | 0.6524              | 3.03                  | 4.65                    |                                      |
| <b>Concordia Station (12/19 to 10/20)*</b> |      |                     |                       |                         |                                      |
| DMC-TB2                                    |      | 0.6697              | 1.99                  | 2.97                    | C <sub>Hg</sub> -avg= 2.64±0.31 ng/g |
| DMC-B4                                     |      | 0.7234              | 1.86                  | 2.58                    | MDL = 0.7 ng, PQL = 2.2 ng           |
| DMC-B6                                     |      | 0.7323              | 1.72                  | 2.35                    |                                      |

\*DMC-B5 was not properly handled and could not be used as a field blank.

Note: Blanks AMS-PB-B10 to AMS-PB-B12 were analyzed by Tekran Instruments Corporation and not at the University of Toronto Scarborough.



**Table S2** Analytical detail on the passive air samplers deployed on Amsterdam Island.

| Code       | From     | To       | Length<br>days | T <sub>avg</sub><br>°C | WS <sub>avg</sub><br>m/s | SR <sub>adj</sub><br>m <sup>3</sup> /day | m <sub>C</sub><br>g | m <sub>Hg</sub><br>ng | Blank<br>% | C <sub>Hg</sub><br>ng/m <sup>3</sup> | C <sub>Hg-avg</sub><br>ng/m <sup>3</sup> | Precision<br>% | Comt.     |
|------------|----------|----------|----------------|------------------------|--------------------------|------------------------------------------|---------------------|-----------------------|------------|--------------------------------------|------------------------------------------|----------------|-----------|
| AMS-PB-S1  | 28-11-18 | 27-12-18 | 28.8           | 16.2                   | 7.80                     | 0.154                                    | 0.722               | (6.940)               | 64%        | 0.563                                | 0.816                                    | 62%            |           |
|            | 3:00 PM  | 10:10 AM |                |                        |                          |                                          | 0.763               | (9.440)               | 50%        | 1.069                                |                                          |                |           |
| AMS-PB-S2  | 27-12-18 | 23-1-19  | 27.0           | 16.4                   | 7.69                     | 0.154                                    | 0.711               | (6.240)               | 70%        | 0.450                                | 0.822                                    | 90%            |           |
|            | 10:10 AM | 9:04 AM  |                |                        |                          |                                          | 0.733               | (9.465)               | 48%        | 1.194                                |                                          |                |           |
| AMS-PB-S3  | 23-1-19  | 20-2-19  | 28.3           | 17.7                   | 6.15                     | 0.151                                    | 0.742               | (10.53)               | 43%        | 1.402                                | 1.487                                    | 12%            |           |
|            | 9:10 AM  | 3:10 PM  |                |                        |                          |                                          | 0.748               | (11.29)               | 41%        | 1.573                                |                                          |                |           |
| AMS-PB-S4  | 20-2-19  | 20-3-19  | 27.8           | 17.5                   | 5.93                     | 0.150                                    | 0.721               | (8.540)               | 52%        | 0.984                                | 0.876                                    | 25%            |           |
|            | 3:25 PM  | 11:43 AM |                |                        |                          |                                          | 0.730               | (7.687)               | 58%        | 0.767                                |                                          |                |           |
| AMS-PB-S5  | 20-3-19  | 24-4-19  | 35.0           | 16.5                   | 7.34                     | 0.153                                    | 0.705               | (9.481)               | 46%        | 0.959                                | 1.169                                    | 36%            |           |
|            | 11:45 AM | 12:48 PM |                |                        |                          |                                          | 0.737               | (11.93)               | 38%        | 1.379                                |                                          |                |           |
| AMS-PB-S6  | 24-4-19  | 15-5-19  | 20.9           | 14.3                   | 8.05                     | 0.153                                    | 0.698               | (7.980)               | 54%        | 1.151                                | 1.193                                    | 7%             |           |
|            | 12:45 PM | 10:55 AM |                |                        |                          |                                          | 0.690               | (8.204)               | 52%        | 1.235                                |                                          |                |           |
| AMS-PB-S7  | 15-5-19  | 12-6-19  | 27.9           | 13.2                   | 8.77                     | 0.155                                    | 0.775               | (7.700)               | 62%        | 0.680                                | 1.166                                    | 83%            |           |
|            | 10:55 AM | 8:55 AM  |                |                        |                          |                                          | 0.716               | (11.53)               | 38%        | 1.652                                |                                          |                |           |
| AMS-PB-S8  | 12-6-19  | 31-7-19  | 49.1           | 12.3                   | 10.11                    | 0.158                                    | 0.751               | (10.80)               | 43%        | 0.799                                | 0.599                                    | 67%            |           |
|            | 8:57 AM  | 11:19 AM |                |                        |                          |                                          | 0.781               | (7.885)               | 61%        | 0.398                                |                                          |                |           |
| AMS-PB-S9  | 31-7-19  | 25-9-19  | 56.0           | 11.2                   | 10.70                    | 0.159                                    | 0.756               | (12.01)               | 39%        | 0.829                                | 0.820                                    | 2%             |           |
|            | 11:30 AM | 11:50 AM |                |                        |                          |                                          | 0.735               | (11.72)               | 39%        | 0.812                                |                                          |                |           |
| AMS-PB-S10 | 25-9-19  | 5-12-19  | 71.5           | 12.7                   | 9.54                     | 0.156                                    | 0.786               | (11.98)               | 40%        | 0.640                                | 0.630                                    | 3%             |           |
|            | 12:00 AM | 11:02 AM |                |                        |                          |                                          | 0.780               | (11.71)               | 41%        | 0.619                                |                                          |                |           |
| AMS-PB-S11 | 5-12-19  | 30-1-20  | 56.2           | 14.8                   | 8.88                     | 0.1562                                   | 0.768               | 20.95                 | 4%         | 2.285                                | 2.069                                    | 21%            | glass jar |
|            | 11:05 AM | 3:57 PM  |                |                        |                          |                                          | 0.724               | 17.09                 | 5%         | 1.852                                |                                          |                |           |
| AMS-PB-S12 | 30-1-20  | 26-3-20  | 55.8           | 15.9                   | 6.86                     | 0.1512                                   | 0.759               | 10.09                 | 9%         | 1.094                                | 1.057                                    | 7%             | glass jar |
|            | 4:30 PM  | 10:43 AM |                |                        |                          |                                          | 0.763               | 9.47                  | 9%         | 1.020                                |                                          |                |           |
| AMS-PB-S13 | 26-3-20  | 28-5-20  | 63.0           | 14.6                   | 9.17                     | 0.1569                                   | 0.785               | 11.16                 | 8%         | 1.037                                | 1.076                                    | 7%             | glass jar |
|            | 10:48 AM | 11:48 AM |                |                        |                          |                                          | 0.772               | 11.92                 | 7%         | 1.115                                |                                          |                |           |
| AMS-PB-S14 | 28-5-20  | 30-7-20  | 63.0           | 11.7                   | 11.47                    | 0.1612                                   | 0.754               | 11.42                 | 8%         | 1.039                                | 1.017                                    | 4%             | glass jar |
|            | 11:48 AM | 12:15 PM |                |                        |                          |                                          | 0.782               | 11.02                 | 8%         | 0.996                                |                                          |                |           |
| AMS-PB-S15 | 30-7-20  | 29-10-20 | 91.0           | 11.5                   | 10.54                    | 0.1583                                   | 0.760               | 15.54                 | 6%         | 1.018                                | 1.040                                    | 4%             | glass jar |
|            | 12:20 PM | 12:08 PM |                |                        |                          |                                          | 0.774               | 16.19                 | 5%         | 1.063                                |                                          |                |           |

**Table S2 ctd.**

| <b>Code</b> | <b>From</b>          | <b>To</b>           | <b>Length</b><br>days | <b>T<sub>avg</sub></b><br>°C | <b>WS<sub>avg</sub></b><br>m/s | <b>SR<sub>adj</sub></b><br>m <sup>3</sup> /day | <b>m<sub>C</sub></b><br>g | <b>m<sub>Hg</sub></b><br>ng | <b>Blank</b><br>% | <b>C<sub>Hg</sub></b><br>ng/m <sup>3</sup> | <b>C<sub>Hg-avg</sub></b><br>ng/m <sup>3</sup> | <b>Precision</b><br>% | <b>Comt.</b>         |
|-------------|----------------------|---------------------|-----------------------|------------------------------|--------------------------------|------------------------------------------------|---------------------------|-----------------------------|-------------------|--------------------------------------------|------------------------------------------------|-----------------------|----------------------|
| AMS-PB-S16  | 29-10-20<br>12:16 PM | 13-2-21<br>4:30 PM  | 107.2                 | 15.5                         | 7.03                           | 0.1513                                         | 0.763<br>0.800            | 26.77<br>17.09              | 3%<br>5%          | 1.603<br>1.054                             | 1.054                                          | n.a.                  | outlier<br>glass jar |
| AMS-PB-S17  | 13-2-21<br>4:40 pm   | 12-5-21<br>9:50 am  | 87.7                  | 16.3                         | 7.39                           | 0.1532                                         | 0.593<br>0.521            | 14.104<br>13.235            | 4%<br>4%          | 1.005<br>0.946                             | 0.975                                          | 6%                    | glass jar            |
| AMS-PB-S18  | 12-5-21<br>9:50 am   | 5-8-21<br>9:52 am   | 85.0                  | 12.5                         | 8.59                           | 0.1533                                         | 0.524<br>0.557            | 12.929<br>13.887            | 4%<br>4%          | 0.951<br>1.022                             | 0.987                                          | 7%                    | glass jar            |
| AMS-PB-S19  | 5-8-21<br>10:25 am   | 4-11-21<br>4:00 pm  | 91.2                  | 11.5                         | 9.69                           | 0.1556                                         | 0.627                     | 14.529                      | 4%                | 0.978                                      | 0.978                                          | n.a.                  | glass jar            |
| AMS-PB-S19b | 5-8-21<br>10:25 am   | 21-9-21<br>2:00 pm* | 47.1                  | 11.2                         | 11.06                          | 0.1595                                         | 0.562                     | 7.594                       | 8%                | 0.934                                      |                                                |                       | glass jar            |

\* This sampler's deployment period is much shorter than that of its duplicate, because it was blown away during a storm. It was retrieved from the ground on Sept. 21, 2021, sealed and analyzed, but not used to calculate an average or replicate precision.

Note: Samples from deployment periods AMS-PB-S16 to AMS-PB-S19 were analyzed by Tekran Instruments Corporation and not at the University of Toronto Scarborough.

**Table S3** Analytical detail on the passive air samplers deployed Concordia Station, Dome C, Antarctica.

| Code       | From                 | To                  | Length<br>days | T <sub>avg</sub> °C | WS <sub>av</sub><br>g m/s | SR <sub>adj</sub><br>m <sup>3</sup> /day | m <sub>C</sub><br>g | m <sub>Hg</sub><br>ng | Blank<br>% | C <sub>Hg</sub><br>ng/m <sup>3</sup> | C <sub>Hg-avg</sub><br>ng/m <sup>3</sup> | Precision<br>% | Comt.     |
|------------|----------------------|---------------------|----------------|---------------------|---------------------------|------------------------------------------|---------------------|-----------------------|------------|--------------------------------------|------------------------------------------|----------------|-----------|
| DMC-AS-S1  | 26-11-18<br>10:45 AM | 24-12-18<br>9:00 AM | 27.9           | -30.81              | 4.37                      | 0.1017                                   | 0.684<br>0.622      | 7.529<br>6.469        | 37%<br>39% | 1.662<br>1.379                       | 1.521                                    | 19%            |           |
| DMC-AS-S2  | 24-12-18<br>9:30 AM  | 28-1-19<br>9:30 AM  | 35.0           | -30.88              | 3.66                      | 0.0994                                   | 0.711<br>0.676      | 8.731<br>7.180        | 33%<br>39% | 1.670<br>1.266                       | 1.468                                    | 28%            |           |
| DMC-AS-S3  | 28-1-19<br>9:43 AM   | 25-2-19<br>10:08    | 28.0           | -40.08              | 4.48                      | 0.0936                                   | 0.674<br>0.671      | 9.551<br>9.192        | 29%<br>30% | 2.586<br>2.453                       | 2.519                                    | 5%             |           |
| DMC-AS-S4  | 25-2-19<br>10:23 AM  | 25-3-19<br>10:08    | 28.0           | -49.43              | 4.72                      | 0.0859                                   | 0.698<br>0.642      | 8.333<br>6.102        | 34%<br>43% | 2.273<br>1.440                       | 1.857                                    | 45%            |           |
| DMC-AS-S5  | 25-3-19<br>10:24 AM  | 25-4-19<br>10:22    | 31.0           | -56.55              | 4.58                      | 0.0791                                   | 0.689<br>0.677      | 7.371<br>5.955        | 38%<br>47% | 1.851<br>1.295                       | 1.573                                    | 35%            |           |
| DMC-AS-S6  | 25-4-19<br>10:45 AM  | 25-5-19<br>10:35    | 30.0           | -59.30              | 3.98                      | 0.0748                                   | 0.694<br>0.624      | 7.121<br>7.468        | 40%<br>34% | 1.902<br>2.185                       | 2.043                                    | 14%            |           |
| DMC-AS-S7  | 25-5-19<br>10:47 AM  | 25-7-19<br>9:25 AM  | 60.9           | -60.41              | 5.40                      | 0.0781                                   | 0.704<br>0.708      | 11.120<br>10.074      | 26%<br>29% | 1.729<br>1.506                       | 1.617                                    | 14%            |           |
| DMC-AS-S8  | 25-7-19<br>9:35 AM   | 25-9-19<br>10:43    | 62.0           | -59.20              | 4.97                      | 0.0779                                   | 0.607<br>0.670      | 7.978<br>10.616       | 31%<br>26% | 1.134<br>1.626                       | 1.380                                    | 36%            |           |
| DMC-AS-S9  | 25-9-19<br>11:04 AM  | 18-11-19<br>10:52   | 54.0           | -49.68              | 4.82                      | 0.0860                                   | 0.596<br>0.622      | 6.353<br>8.901        | 39%<br>29% | 0.841<br>1.367                       | 1.104                                    | 48%            |           |
| DMC-AS-S10 | 18-11-19<br>11:18 AM | 16-1-20<br>4:50 PM  | 59.2           | -29.84              | 3.84                      | 0.1009                                   | 0.695<br>0.681      | 15.323<br>10.593      | 12%<br>17% | 2.256<br>1.472                       | 1.864                                    | 42%            | glass jar |
| DMC-AS-S11 | 16-1-20<br>5:08 PM   | 16-3-20<br>3:45 PM  | 59.9           | -36.00              | 3.97                      | 0.0958                                   | 0.729<br>0.677      | 11.759<br>10.149      | 16%<br>18% | 1.713<br>1.457                       | 1.585                                    | 16%            | glass jar |
| DMC-AS-S12 | 16-3-20<br>3:50 PM   | 18-5-20<br>11:38    | 62.8           | -57.67              | 4.34                      | 0.0774                                   | 0.721<br>0.710      | 10.693<br>10.223      | 18%<br>18% | 1.808<br>1.717                       | 1.763                                    | 5%             | glass jar |
| DMC-AS-S13 | 18-5-20<br>11:42 AM  | 20-7-20<br>2:56 PM  | 63.1           | -60.65              | 4.58                      | 0.0754                                   | 0.711<br>0.690      | 9.570<br>12.842       | 20%<br>14% | 1.616<br>2.315                       | 1.966                                    | 36%            | glass jar |
| DMC-AS-S14 | 20-7-20<br>3:08 PM   | 21-9-20<br>2:53 PM  | 63.0           | -60.09              | 5.24                      | 0.0779                                   | 0.756<br>0.775      | 10.439<br>9.503       | 19%<br>22% | 1.721<br>1.520                       | 1.621                                    | 12%            | glass jar |
| DMC-AS-S15 | 21-9-20<br>3:02 PM   | 21-12-20<br>3:15 PM | 91.0           | -43.92              | 5.10                      | 0.0920                                   | 0.662<br>0.723      | 16.121<br>17.355      | 11%<br>11% | 1.716<br>1.844                       | 1.780                                    | 7%             | glass jar |

**Table S4** Analytical detail on the passive air samplers deployed at Piton Bleu, La Réunion.

| Code      | From     | To       | Length<br>days | T <sub>avg</sub><br>°C | WS <sub>avg</sub><br>m/s | SR <sub>adj</sub><br>m <sup>3</sup> /day | m <sub>C</sub><br>g | m <sub>Hg</sub><br>ng | Blank<br>% | C <sub>Hg</sub><br>ng/m <sup>3</sup> | C <sub>Hg-avg</sub><br>ng/m <sup>3</sup> | Precision<br>% | Comt.   |
|-----------|----------|----------|----------------|------------------------|--------------------------|------------------------------------------|---------------------|-----------------------|------------|--------------------------------------|------------------------------------------|----------------|---------|
| RU-PB-S1  | 7-11-17  | 11-12-17 | 33.9           | 14.26                  | 3.04                     | 0.1382                                   | 0.600               | 5.721                 | 12%        | 1.076                                | 1.087                                    | 2.0%           |         |
|           | 14:30    | 11:30    |                |                        |                          |                                          | 0.619               | 5.845                 | 12%        | 1.098                                |                                          |                |         |
| RU-PB-S2  | 11-12-17 | 13-1-18  | 33.1           | 15.56                  | 4.79                     | 0.1446                                   | 0.612               | 7.090                 | 10%        | 1.336                                | 1.295                                    | 6.4%           |         |
|           | 11:50    | 13:50    |                |                        |                          |                                          | 0.693               | 6.785                 | 12%        | 1.253                                |                                          |                |         |
| RU-PB-S3  | 13-1-18  | 17-2-18  | 34.9           | 16.64                  | 2.75                     | 0.1395                                   | 0.651               | 6.986                 | 11%        | 1.284                                | 1.299                                    | 2.4%           |         |
|           | 14:00    | 11:00    |                |                        |                          |                                          | 0.651               | 7.136                 | 10%        | 1.314                                |                                          |                |         |
| RU-PB-S4  | 17-2-18  | 10-3-18  | 21.2           | 15.96                  | 4.47                     | 0.1440                                   | 0.642               | 5.009                 | 15%        | 1.404                                | 1.391                                    | 1.9%           |         |
|           | 11:15    | 15:00    |                |                        |                          |                                          | 0.692               | 4.986                 | 16%        | 1.377                                |                                          |                |         |
| RU-PB-S5  | 10-3-18  | 4-4-18   | 24.8           | 15.66                  | 3.92                     | 0.1421                                   | 0.637               | 5.526                 | 13%        | 1.359                                | 1.247                                    | 18%            |         |
|           | 15:15    | 11:30    |                |                        |                          |                                          | 0.642               | 4.735                 | 15%        | 1.134                                |                                          |                |         |
| RU-PB-S6  | 4-4-18   | 29-4-18  | 24.9           | 14.27                  | 3.48                     | 0.1396                                   | 0.680               | 4.555                 | 17%        | 1.088                                | 1.127                                    | 6.9%           |         |
|           | 11:45    | 9:30     |                |                        |                          |                                          | 0.643               | 4.785                 | 15%        | 1.166                                |                                          |                |         |
| RU-PB-S7  | 29-4-18  | 28-5-18  | 28.9           | 12.47                  | 3.01                     | 0.1365                                   | 0.678               | 5.280                 | 15%        | 1.141                                | 1.112                                    | 5.2%           |         |
|           | 9:35     | 8:00     |                |                        |                          |                                          | 0.670               | 5.044                 | 15%        | 1.084                                |                                          |                |         |
| RU-PB-S8  | 28-5-18  | 25-6-18  | 28.4           | 11.51                  | 2.47                     | 0.1340                                   | 0.703               | 5.422                 | 15%        | 1.215                                | 1.065                                    | 28%            |         |
|           | 8:05     | 5:00     |                |                        |                          |                                          | 0.638               | 4.207                 | 17%        | 0.915                                |                                          |                |         |
| RU-PB-S9  | 25-6-18  | 6-8-18   | 42.5           | 9.32                   | 3.62                     | 0.1355                                   | 0.624               | 11.57                 | 24%        | 1.555                                | 1.073                                    | n.a.           | outlier |
|           | 12:00    | 10:55    |                |                        |                          |                                          | 0.666               | 9.016                 | 32%        | 1.073                                |                                          |                |         |
| RU-PB-S10 | 6-8-18   | 4-9-18   | 29.1           | 10.44                  | 4.58                     | 0.1394                                   | 0.564               | 6.458                 | 38%        | 0.988                                | 1.059                                    | 13%            |         |
|           | 11:00    | 13:42    |                |                        |                          |                                          | 0.648               | 7.395                 | 38%        | 1.129                                |                                          |                |         |
| RU-PB-S11 | 4-9-18   | 12-10-18 | 37.7           | 11.14                  | 4.23                     | 0.1390                                   | 0.630               | 8.318                 | 33%        | 1.054                                | 0.986                                    | 14%            |         |
|           | 13:52    | 07:45    |                |                        |                          |                                          | 0.635               | 7.616                 | 36%        | 0.917                                |                                          |                |         |
| RU-PB-S12 | 12-10-18 | 10-12-18 | 59.1           | 13.07                  | 2.95                     | 0.1369                                   | 0.645               | 5.840                 | 48%        | 0.374                                | 0.910                                    | n.a.           | outlier |
|           | 07:45    | 10:55    |                |                        |                          |                                          | 0.620               | 10.06                 | 27%        | 0.910                                |                                          |                |         |
| RU-PB-S13 | 10-12-18 | 13-02-19 | 64.9           | 15.87                  | 3.37                     | 0.1407                                   | 0.649               | 10.93                 | 26%        | 0.885                                | 0.895                                    | 2%             |         |
|           | 11:00    | 09:10    |                |                        |                          |                                          | 0.642               | 11.07                 | 25%        | 0.904                                |                                          |                |         |



**Table S5** Analytical detail on the passive air samplers deployed at University of Réunion, Saint-Denis, La Réunion.

| Code     | From              | To               | Length<br>days | T <sub>avg</sub><br>°C | WS <sub>avg</sub><br>m/s | SR <sub>adj</sub><br>m <sup>3</sup> /day | m <sub>C</sub><br>g | m <sub>Hg</sub><br>ng | Blank<br>% | C <sub>Hg</sub><br>ng/m <sup>3</sup> | C <sub>Hg-avg</sub><br>ng/m <sup>3</sup> | Precision<br>% | Comt.   |
|----------|-------------------|------------------|----------------|------------------------|--------------------------|------------------------------------------|---------------------|-----------------------|------------|--------------------------------------|------------------------------------------|----------------|---------|
| RU-UR-S1 | 30-10-17<br>15:15 | 1-12-17<br>11:30 | 31.8           | 24.9                   | 5.18                     | 0.1542                                   | 0.636               | 6.418                 | 11%        | 1.160                                | 1.160                                    | n.a            | outlier |
|          |                   |                  |                |                        |                          |                                          | 0.639               | 14.086                | 5%         | 2.721                                |                                          |                |         |
| RU-UR-S2 | 1-12-17<br>11:40  | 5-1-18<br>10:00  | 34.9           | 27.0                   | 5.51                     | 0.1571                                   | 0.641               | 5.823                 | 13%        | 0.928                                | 1.091                                    | 30%            |         |
|          |                   |                  |                |                        |                          |                                          | 0.628               | 7.598                 | 9%         | 1.254                                |                                          |                |         |
| RU-UR-S3 | 5-1-18<br>10:30   | 5-2-18<br>15:20  | 31.2           | 27.0                   | 4.95                     | 0.1554                                   | 0.711               | 6.237                 | 13%        | 1.119                                | 1.145                                    | 4.6%           |         |
|          |                   |                  |                |                        |                          |                                          | 0.665               | 6.439                 | 12%        | 1.172                                |                                          |                |         |
| RU-UR-S4 | 5-2-18<br>15:30   | 8-3-18<br>14:45  | 31.0           | 27.1                   | 4.69                     | 0.1547                                   | 0.653               | 5.858                 | 13%        | 1.068                                | 1.142                                    | 13%            |         |
|          |                   |                  |                |                        |                          |                                          | 0.620               | 6.536                 | 11%        | 1.217                                |                                          |                |         |
| RU-UR-S5 | 8-3-18<br>15:15   | 4-4-18<br>17:00  | 27.1           | 26.7                   | 5.54                     | 0.1569                                   | 0.639               | 5.069                 | 14%        | 1.022                                | 1.046                                    | 4.6%           |         |
|          |                   |                  |                |                        |                          |                                          | 0.680               | 5.320                 | 15%        | 1.070                                |                                          |                |         |
| RU-UR-S6 | 4-4-18<br>17:15   | 2-5-18<br>17:30  | 28.0           | 25.4                   | 5.37                     | 0.1553                                   | 0.628               | 6.057                 | 12%        | 1.228                                | 1.212                                    | 2.6%           |         |
|          |                   |                  |                |                        |                          |                                          | 0.684               | 5.982                 | 13%        | 1.196                                |                                          |                |         |
| RU-UR-S7 | 2-5-18<br>17:35   | 28-5-18<br>12:15 | 25.8           | 24.5                   | 5.31                     | 0.1543                                   | 0.716               | 5.021                 | 16%        | 1.057                                | 1.001                                    | 11%            |         |
|          |                   |                  |                |                        |                          |                                          | 0.700               | 4.556                 | 17%        | 0.945                                |                                          |                |         |
| RU-UR-S8 | 28-5-18<br>12:20  | 25-6-18<br>6:30  | 27.8           | 23.0                   | 4.79                     | 0.1513                                   | 0.623               | 4.808                 | 15%        | 0.976                                | 0.910                                    | 15%            |         |
|          |                   |                  |                |                        |                          |                                          | 0.635               | 4.269                 | 17%        | 0.844                                |                                          |                |         |

**Table S6** Analytical detail on the passive air samplers deployed at Piton Partage, La Réunion.

| Code      | From             | To               | Length<br>days | T <sub>avg</sub><br>°C | WS <sub>avg</sub><br>m/s | SR <sub>adj</sub><br>m <sup>3</sup> /day | m <sub>C</sub><br>g | m <sub>Hg</sub><br>ng | Blank<br>% | C <sub>Hg</sub><br>ng/m <sup>3</sup> | C <sub>Hg-avg</sub><br>ng/m <sup>3</sup> | Precision<br>% | Comt.   |
|-----------|------------------|------------------|----------------|------------------------|--------------------------|------------------------------------------|---------------------|-----------------------|------------|--------------------------------------|------------------------------------------|----------------|---------|
| RU-PPA-S1 | 4-4-18<br>8:00   | 29-4-18<br>12:30 | 25.19          | 12.79                  | 3.51                     | 0.1383                                   | 0.745               | 4.671                 | 18%        | 1.097                                | 1.071                                    | 4.9%           |         |
|           |                  |                  |                |                        |                          |                                          | 0.688               | 4.422                 | 18%        | 1.044                                |                                          |                |         |
| RU-PPA-S2 | 29-4-18<br>12:35 | 28-5-18<br>9:30  | 28.87          | 10.87                  | 3.43                     | 0.1363                                   | 0.712               | 5.201                 | 16%        | 1.115                                | 0.943                                    | 16%            |         |
|           |                  |                  |                |                        |                          |                                          | 0.715               | 4.606                 | 18%        | 0.963                                |                                          |                |         |
| RU-PPA-S3 | 28-5-18<br>9:35  | 25-6-18<br>15:00 | 28.23          | 9.29                   | 3.39                     | 0.1348                                   | 0.729               | 4.911                 | 17%        | 1.072                                | 1.072                                    | n.a.           | outlier |
|           |                  |                  |                |                        |                          |                                          | 0.735               | 6.251                 | 13%        | 1.423                                |                                          |                |         |

**Table S7** Analytical detail on the passive air samplers deployed at Maïdo Observatory, La Réunion.

| Code     | From              | To                | Length<br>days | T <sub>avg</sub><br>°C | WS <sub>avg</sub><br>m/s | SR <sub>adj</sub><br>m <sup>3</sup> /day | m <sub>C</sub><br>g | m <sub>Hg</sub><br>ng | Blank<br>% | C <sub>Hg</sub><br>ng/m <sup>3</sup> | C <sub>Hg-avg</sub><br>ng/m <sup>3</sup> | Precision<br>% | Comt. |
|----------|-------------------|-------------------|----------------|------------------------|--------------------------|------------------------------------------|---------------------|-----------------------|------------|--------------------------------------|------------------------------------------|----------------|-------|
| RU-MO-S1 | 2-11-17<br>10:15  | 29-11-17<br>10:50 | 27.0           | 12.3                   | 3.00                     | 0.1364                                   | 0.6419              | 4.937                 | 15%        | 1.141                                | 1.20                                     | 10.3%          |       |
|          |                   |                   |                |                        |                          |                                          | 0.6415              | 5.394                 | 14%        | 1.265                                |                                          |                |       |
| RU-MO-S2 | 29-11-17<br>11:15 | 4-1-18<br>9:00    | 35.9           | 13.4                   | 3.01                     | 0.1374                                   | 0.6196              | 6.608                 | 11%        | 1.197                                | 1.18                                     | 3.3%           |       |
|          |                   |                   |                |                        |                          |                                          | 0.6172              | 6.415                 | 11%        | 1.158                                |                                          |                |       |
| RU-MO-S3 | 4-1-18<br>9:23    | 5-2-18<br>8:30    | 32.0           | 14.8                   | 4.24                     | 0.1423                                   | 0.6923              | 5.740                 | 14%        | 1.089                                | 1.09                                     | 0.8%           |       |
|          |                   |                   |                |                        |                          |                                          | 0.6223              | 5.702                 | 12%        | 1.098                                |                                          |                |       |
| RU-MO-S4 | 5-2-18<br>8:35    | 8-3-18<br>6:45    | 30.9           | 14.3                   | 4.37                     | 0.1422                                   | 0.7064              | 5.940                 | 14%        | 1.168                                | 1.11                                     | 9.7%           |       |
|          |                   |                   |                |                        |                          |                                          | 0.6796              | 5.433                 | 14%        | 1.059                                |                                          |                |       |
| RU-MO-S5 | 8-3-18<br>7:10    | 3-4-18<br>9:30    | 26.1           | 14.2                   | 4.26                     | 0.1418                                   | 0.6344              | 4.687                 | 15%        | 1.071                                | 1.11                                     | 6.7%           |       |
|          |                   |                   |                |                        |                          |                                          | 0.6821              | 5.014                 | 15%        | 1.145                                |                                          |                |       |
| RU-MO-S6 | 3-4-18<br>9:45    | 2-5-18<br>9:00    | 29.0           | 13.1                   | 3.28                     | 0.1379                                   | 0.6497              | 5.199                 | 14%        | 1.116                                | 1.05                                     | 11.7%          |       |
|          |                   |                   |                |                        |                          |                                          | 0.6242              | 4.678                 | 15%        | 0.993                                |                                          |                |       |
| RU-MO-S7 | 2-5-18<br>9:15    | 31-5-18<br>17:15  | 29.3           | 10.9                   | 3.36                     | 0.1362                                   | 0.6519              | 5.002                 | 15%        | 1.066                                | 1.22                                     | 25%            |       |
|          |                   |                   |                |                        |                          |                                          | 0.6579              | 6.222                 | 12%        | 1.370                                |                                          |                |       |
| RU-MO-S8 | 31-5-18<br>17:30  | 25-6-18<br>9:30   | 24.7           | 9.4                    | 3.45                     | 0.1351                                   | 0.6222              | 4.554                 | 16%        | 1.154                                | 1.26                                     | 17%            |       |
|          |                   |                   |                |                        |                          |                                          | 0.1163              | 0.6777                | 15%        | 1.363                                |                                          |                |       |

**Table S8** Analytical detail on the passive air samplers deployed at Volcano Summit, La Réunion.

| Code     | From             | To               | Length<br>days | T <sub>avg</sub><br>°C | WS <sub>avg</sub><br>m/s | SR <sub>adj</sub><br>m <sup>3</sup> /day | m <sub>C</sub><br>g | m <sub>Hg</sub><br>ng | Blank<br>% | C <sub>Hg</sub><br>ng/m <sup>3</sup> | C <sub>Hg-avg</sub><br>ng/m <sup>3</sup> | Precision<br>% | Comt. |
|----------|------------------|------------------|----------------|------------------------|--------------------------|------------------------------------------|---------------------|-----------------------|------------|--------------------------------------|------------------------------------------|----------------|-------|
| RU-VS-S1 | 7-11-17<br>10:30 | 11-12-17<br>9:15 | 33.9           | 11.01                  | 4.25                     | 0.1389                                   | 0.635               | 6.808                 | 11%        | 1.290                                | 1.233                                    | 9.3%           |       |
|          |                  |                  |                |                        |                          |                                          | 0.673               | 6.309                 | 12%        | 1.175                                |                                          |                |       |
| RU-VS-S2 | 11-12-17<br>9:30 | 10-3-18<br>10:00 | 89.0           | 12.50                  | 5.43                     | 0.1438                                   | 0.668               | 15.058                | 5%         | 1.117                                | 1.117                                    | n.a.           |       |
|          |                  |                  |                |                        |                          |                                          | 0.649               | n.a.                  |            | n.a.                                 |                                          |                | lost  |
| RU-VS-S3 | 10-3-18<br>10:15 | 26-6-18<br>10:00 | 108.0          | 11.64                  | 4.58                     | 0.1405                                   | 0.738               | 17.737                | 5%         | 1.114                                | 1.122                                    | 1.5%           |       |
|          |                  |                  |                |                        |                          |                                          | 0.717               | 17.969                | 5%         | 1.131                                |                                          |                |       |

**Table S9** Analytical detail on the passive air samplers deployed at the Mare-Longue Forest, La Réunion.

| Code      | From              | To                | Length<br>days | T <sub>avg</sub><br>°C | WS <sub>avg</sub><br>m/s | SR <sub>adj</sub><br>m <sup>3</sup> /day | m <sub>C</sub><br>g | m <sub>Hg</sub><br>ng | Blank<br>% | C <sub>Hg</sub><br>ng/m <sup>3</sup> | C <sub>Hg-avg</sub><br>ng/m <sup>3</sup> | Precision<br>% | Comt. |
|-----------|-------------------|-------------------|----------------|------------------------|--------------------------|------------------------------------------|---------------------|-----------------------|------------|--------------------------------------|------------------------------------------|----------------|-------|
| RU-MLF-S1 | 8-11-17<br>9:00   | 10-12-17<br>10:30 | 32.06          | 24.95                  | 2.90                     | 0.1474                                   | 0.6627              | 5.555                 | 14%        | 1.016                                | 1.032                                    | 3.1%           |       |
|           |                   |                   |                |                        |                          |                                          | 0.6789              | 5.726                 | 14%        | 1.048                                |                                          |                |       |
| RU-MLF-S2 | 10-12-17<br>11:00 | 11-1-18<br>9:30   | 31.94          | 26.25                  | 3.28                     | 0.1497                                   | 0.6954              | 4.835                 | 16%        | 0.845                                | 0.807                                    | 9.5%           |       |
|           |                   |                   |                |                        |                          |                                          | 0.697               | 4.472                 | 18%        | 0.769                                |                                          |                |       |
| RU-MLF-S3 | 11-1-18<br>9:45   | 12-2-18<br>8:15   | 27.98          | 25.96                  | 2.86                     | 0.1482                                   | 0.6659              | 4.462                 | 17%        | 0.893                                | 0.991                                    | 20%            |       |
|           |                   |                   |                |                        |                          |                                          | 0.6185              | 5.22                  | 13%        | 1.089                                |                                          |                |       |
| RU-MLF-S4 | 12-2-18<br>8:30   | 12-3-18<br>8:00   | 27.98          | 26.24                  | 3.00                     | 0.1489                                   | 0.7423              | 4.444                 | 19%        | 0.864                                | 0.889                                    | 5.6%           |       |
|           |                   |                   |                |                        |                          |                                          | 0.6989              | 4.603                 | 17%        | 0.914                                |                                          |                |       |
| RU-MLF-S5 | 12-3-18<br>8:15   | 7-4-18<br>9:15    | 26.04          | 25.69                  | 3.04                     | 0.1485                                   | 0.6860              | 4.409                 | 18%        | 0.938                                | 0.900                                    | 8.3%           |       |
|           |                   |                   |                |                        |                          |                                          | 0.6960              | 4.13                  | 19%        | 0.863                                |                                          |                |       |
| RU-MLF-S6 | 7-4-18<br>9:30    | 1-6-18<br>12:00   | 55.10          | 23.40                  | 2.82                     | 0.1458                                   | 0.7635              | 7.895                 | 11%        | 0.875                                | 0.856                                    | 4.3%           |       |
|           |                   |                   |                |                        |                          |                                          | 0.6638              | 7.486                 | 10%        | 0.838                                |                                          |                |       |
| RU-MLF-S7 | 1-6-18<br>12:15   | 27-6-18<br>8:00   | 25.82          | 21.72                  | 2.67                     | 0.1438                                   | 0.7119              | 4.024                 | 20%        | 0.865                                | 1.008                                    | 28%            |       |
|           |                   |                   |                |                        |                          |                                          | 0.6974              | 5.066                 | 16%        | 1.150                                |                                          |                |       |

**Table S10** Analytical detail on the passive air samplers deployed at the Eruptive Cone, La Réunion.

| Code     | From             | To              | Length<br>days | T <sub>avg</sub><br>°C | WS <sub>avg</sub><br>m/s | SR <sub>adj</sub><br>m <sup>3</sup> /day | m <sub>C</sub><br>g | m <sub>Hg</sub><br>ng | Blank<br>% | C <sub>Hg</sub><br>ng/m <sup>3</sup> | C <sub>Hg-avg</sub><br>ng/m <sup>3</sup> | Precision<br>% | Comt. |
|----------|------------------|-----------------|----------------|------------------------|--------------------------|------------------------------------------|---------------------|-----------------------|------------|--------------------------------------|------------------------------------------|----------------|-------|
| RU-EC-S1 | 28-4-18<br>13:17 | 4-5-18<br>15:55 | 6.1            | 11.65                  | 3.923                    | 0.1385                                   | 0.6609              | 1.909                 | 39%        | 1.366                                | 1.437                                    | 10%            |       |
|          |                  |                 |                |                        |                          |                                          | 0.6982              | 2.071                 | 38%        | 1.507                                |                                          |                |       |

## **Discussion of whether a number of factors could provide an explanation of the larger than expected discrepancy between passive and active sampling at Maïdo Observatory**

*Insufficient Blank Correction:* As was discussed above, the blank-correction applied in this study was quite substantial, namely amounted to on average 14 % of the sequestered mass of Hg. It was further identified as the main reason for the relatively poor duplicate precision. In order for PAS-derived concentrations to match the TEKTRAN-derived concentrations, the blank-adjustment would have to be increased by 1 ng (i.e. 1.75 ng instead of 0.75 ng, 32 % instead of 14 %). This, in turn, would require the (average) field blank concentration to be 2.65 ng Hg/g C (instead of 1.14 ng/g). However, even the most contaminated field blank only had a concentration of 1.7 ng/g. Therefore, it is not plausible that an insufficient blank correction is responsible for the discrepancy.

*Sampling Rate Dependence on Meteorological Conditions:* The sampling rate of the passive air sampler is dependent on the temperature and wind speed conditions during the time period of deployment. Therefore, we adjust the generic global sampling rate of 0.135 m<sup>3</sup>/day, which is applicable to a temperature of 9.89 °C and a wind speed to 3.4 m/s, to the local meteorological conditions using the empirical equation by McLagan et al. (2018b). The meteorological conditions prevailing in Maïdo (see Table 2) are quite close to the average of the conditions encountered at the sampling sites contributing to the global calibration of the PAS. The average temperature (13.28 °C during the eight months of the study) was only slightly higher than 9.89 °C, and the average wind speed (3.65 m/s) is almost the same as 3.4 m/s. Accordingly, the adjustment to the sampling rate were minor, i.e., the sampling rate was increased by at most 5 % to 0.142 m<sup>3</sup>/day. In order for the PAS-derived concentrations to match the TEKTRAN-recorded values, we would have to apply a sampling rate around 1.85 m<sup>3</sup>/day. Such high sampling rates had previously only been recorded at Cape Grim in Australia, which is a site experiencing sustained high winds. While there is some uncertainty in the adjustment of the sampling rate for temperature and wind speed, it is difficult to believe that an error in that procedure would lead to such a large underestimation of the sampling rate.

*Bias in Sampling Rate Caused by Diurnal Variability.* The TEKTRAN measurements reveal that the GEM concentrations at Maïdo have a strong diurnal variability with levels that peak around noon. Temperature, of course, also has a diurnal pattern with a peak around noon, so that GEM concentrations and air temperature are synchronized. An example is shown in Figure S13, which shows the diurnal variability of each hour's median temperature, wind speed and GEM concentration during the deployment period 5 at Maïdo.



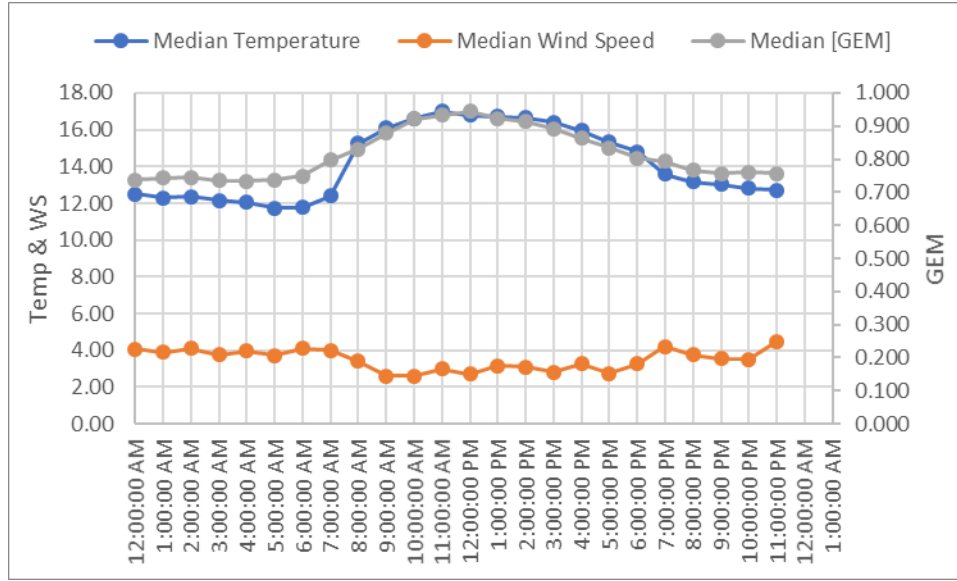

**Figure S13** Diurnal variability of ambient air temperature, wind speed and gaseous elemental mercury concentration at Maïdo Observatory during the fifth passive sampler deployment period.

Because the sampling rate of the passive air sampler increases with increasing temperature (due to an increase in the diffusivity of gaseous mercury) (McLagan et al. 2017a), the sampling may be slightly biased towards time periods of higher GEM concentration, i.e. does not provide a true time-averaged concentration. We estimated the size of that bias as follows:

- We first estimated a sampling rate  $SR_i$  for each hour of deployment  $i$  using the average temperature  $T_i$  and wind speed  $WS_i$  during that hour (as recorded at Maïdo).
- The average of all of these hourly uptake rates equals the sampling rate for the entire length of deployment using the average temperature and wind speed during that month-long deployment period.

$$SR1 = \frac{\sum_i SR_i(T_i, WS_i)}{n_i} = SR_{avg}(T_{avg}, WS_{avg})$$

Where  $n_i$  is the number of hours in the deployment period. This is the sampling rate listed in Table 3 and was used to calculate the PAS-derived GEM concentration in that table.

- Alternatively, we calculated the sampling rate by dividing the sum of the hourly uptake rates (calculated as the product of the hourly sampling rate and the hourly GEM concentration) by the product of the average GEM concentration and the deployment period  $t$  in days.

$$SR2 = \frac{\sum_i (SR_i \cdot GEM_i)}{GEM_{avg} \cdot t}$$

The extent to which SR2 deviates from SR1 indicates the bias incurred by ignoring the diurnal variability in the sampling rate. The data in Table S11 suggest that the synchronicity of temperature and GEM concentration leads to an effective sampling rate that is slightly higher than the one

estimated from average meteorological data seven out of eight times. However, that bias overall is very small (at most a third of a percent) and cannot explain the much larger discrepancy in the GEM concentrations derived by PAS and TEKRAN.

**Table S11** Estimation of the bias introduced by ignoring the diurnal variability in temperature, wind speed and gaseous elemental mercury concentration.

| Sample ID | SR1    | SR2    | Bias    |
|-----------|--------|--------|---------|
| RU-MO-S1  | 0.1364 | 0.1366 | 0.14 %  |
| RU-MO-S2  | 0.1373 | 0.1375 | 0.14 %  |
| RU-MO-S3  | 0.1420 | 0.1416 | -0.29 % |
| RU-MO-S4  | 0.1422 | 0.1426 | 0.27 %  |
| RU-MO-S5  | 0.1418 | 0.1423 | 0.32 %  |
| RU-MO-S6  | 0.1379 | 0.1380 | 0.07 %  |
| RU-MO-S7  | 0.1361 | 0.1362 | 0.06 %  |
| RU-MO-S8  | 0.1351 | 0.1352 | 0.12 %  |

*Elevation Effect on Sampling Rate.* Maïdo Observatory is located at 2160 m above sea level. The lower atmospheric pressure at that altitude implies that the air is on average 23 % thinner there than at sea level. Because the air is thinner, we should lower the sampling rate to an extent that is proportional to the lower atmospheric pressure. On the other hand, the diffusivity of mercury at higher altitude is faster, which would require us to increase the sampling rate at higher altitude, again to an extent that is proportional to the lower atmospheric pressure. Lowering and increasing the sampling rate to the same extent means that the two effects cancel each other out and no adjustment should be necessary for a comparison with TEKRAN data, which are based on 1 atm of atmospheric pressure (i.e. sea level) (McLagan et al., 2018b).

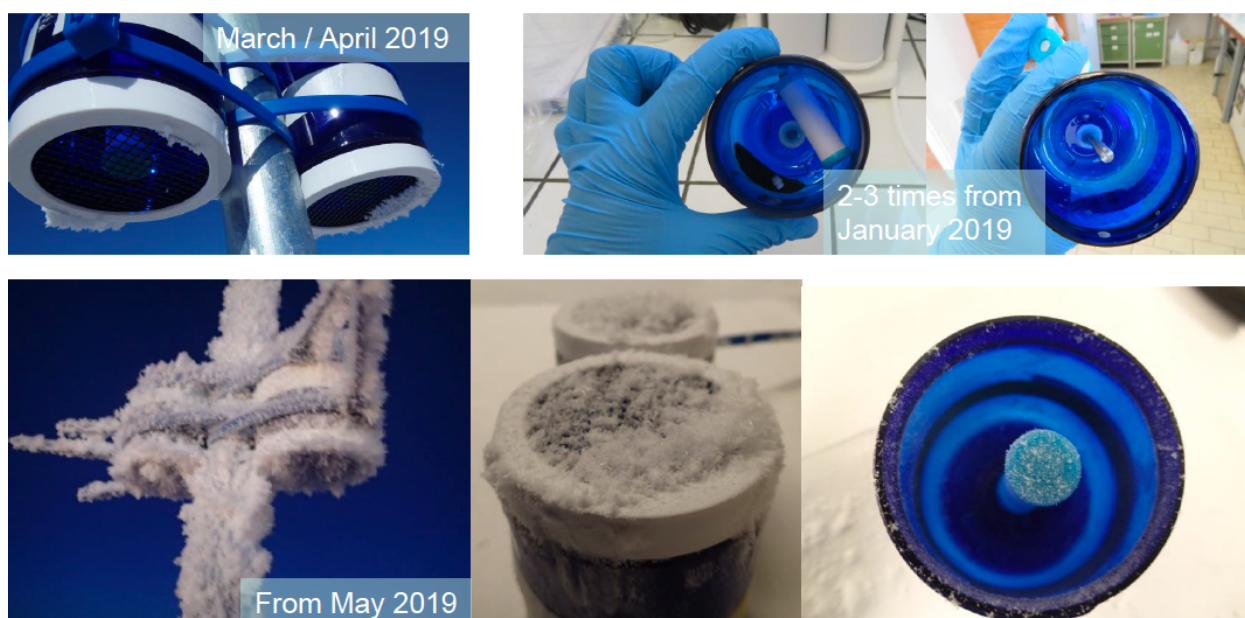

**Figure S14** Hoar frost and material failures encountered during deployments of passive air samplers at Concordia Station, Dome C, Antarctica (credit: Julien Moye).
